# Supplementary material for: The role of spontaneous orientation polarization on charge storage behavior at an interface between organic semiconductor layers
Source: Royal Society of Chemistry journal article supplement (doi:10.1039/d3tc03979j), 2023-12-07
Supplement: d3tc03979j1.pdf [file d3tc03979j1.pdf]

## Supporting Information

### TITLE:

# The role of spontaneous orientation polarization on charge storage behavior at an interface between organic semiconductor layers

### AUTHORS:

Takahiko Yamanaka, <sup>a</sup> Hajime Nakanotani, <sup>\*bc</sup> and Chihaya Adachi <sup>\*bc</sup>

### AFFILIATIONs:

---

- a) Central Research Laboratory, Hamamatsu Photonics K.K., 5000 Hirakuchi, Hamakita-ku, Hamamatsu, Shizuoka 434-8601, Japan.
- b) Center for Organic Photonics and Electronics Research (OPERA) and Department of Applied Chemistry, Kyushu University, 744 Motooka, Nishi, Fukuoka 819-0395, Japan.
- c) International Institute for Carbon Neutral Energy Research (WPI-I2CNER), Kyushu University, 744 Motooka, Nishi 819-0395, Fukuoka, Japan.

Correspondence and material requests should be addressed to H.N. (nakanotani@cstf.kyushu-u.ac.jp), C.A. (adachi@opera.kyushu-u.ac.jp).

### Contents

Figure S1: Schematic illustration of spontaneous orientation polarization and giant surface potential

Figure S2: Current density-voltage characteristic of the charge storage device

Figure S3: DCM characterization of T2T, TPBi, and PPT devices in dark condition

Figure S4: DCM characterization of T2T, TPBi, and PPT devices after light irradiation

Figure S5: DCM characteristics with open circuit treatment after light irradiation

Figure S6: Electroluminescence of T2T device after open circuit treatment

Figure S7: Charge storage characterization in the condition of initial charge of ~3 nC

Figure S8: Characterization of SOP and charge storage ability in a device including different host materials

Table S1: Electrical properties of a charge storage device including different host materials

Figure S1.

In film

Giant surface potential (GSP)

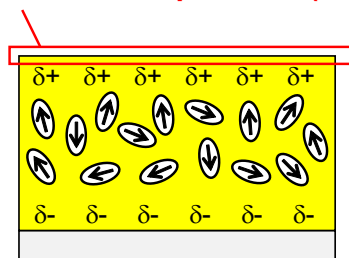

↗ : Permanent dipole moment (PDM) of molecules

spontaneous ordering of PDMs

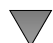

Spontaneous orientation polarization (SOP)

In device

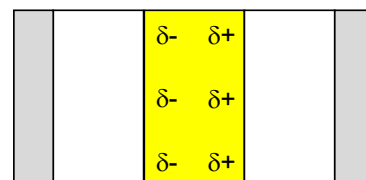

Potential

GSP slope

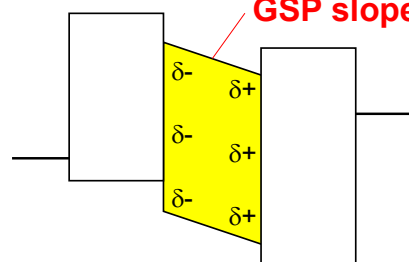

Figure S1: Schematic illustration of spontaneous orientation polarization and giant surface potential.

Figure S2.

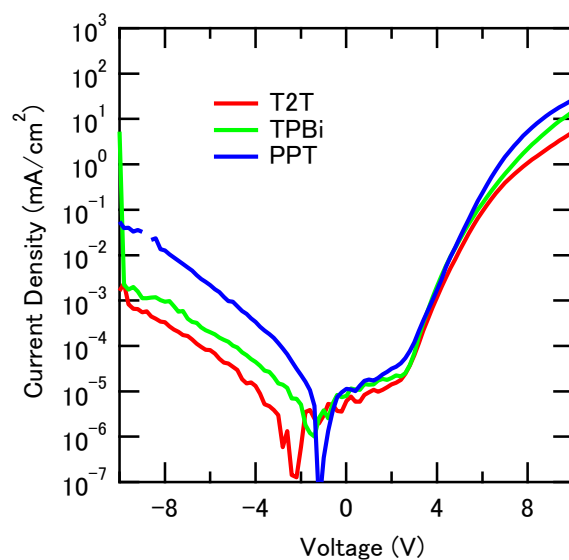

Figure S2: Current density-voltage characteristics of the charge storage devices in continuous-wave (CW) operation.

**Figure S3.**

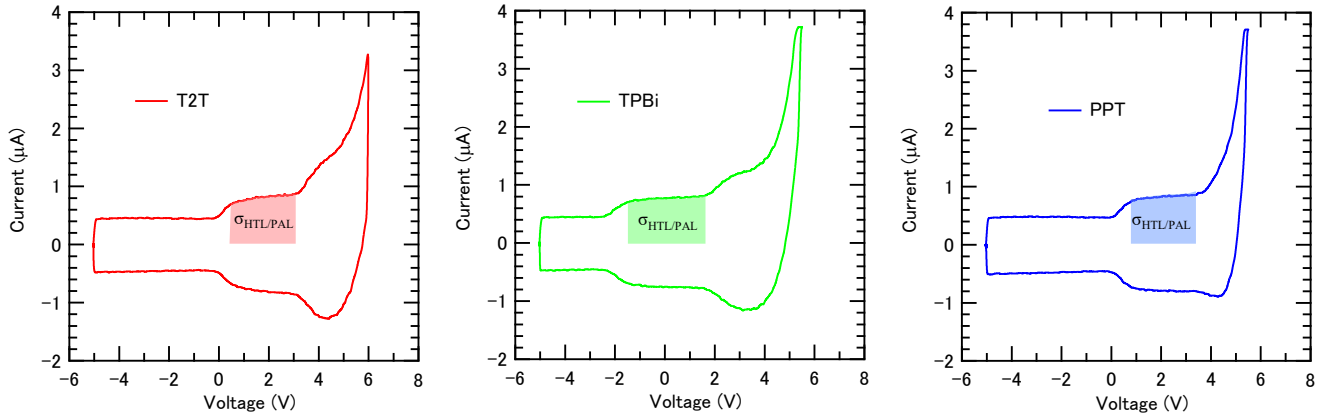

**Figure S3:** DCM characterization of T2T, TPBi, and PPT devices in dark condition. Interfacial charge density at HTL/PAL ( $\sigma_{\text{HTL/PAL}}$ ) is calculated by integrating filled area.

**Figure S4.**

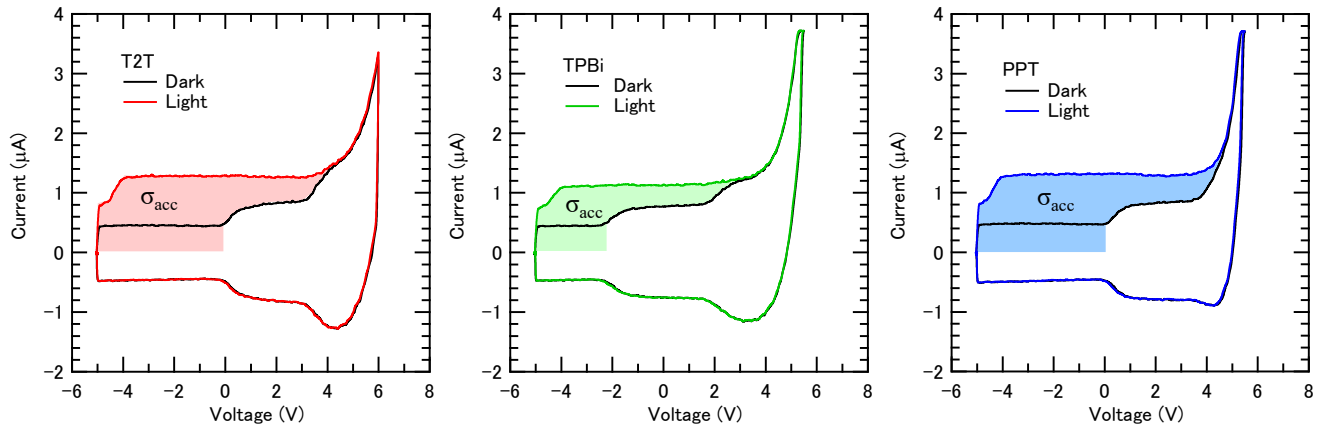

**Figure S4:** DCM characterization of T2T, TPBi, and PPT devices after light irradiation. Accumulated electrons in the devices ( $\sigma_{\text{acc}}$ : filled area) are estimated by subtracting integration of DCM curve after light irradiation from that in dark condition.

**Figure S5.**

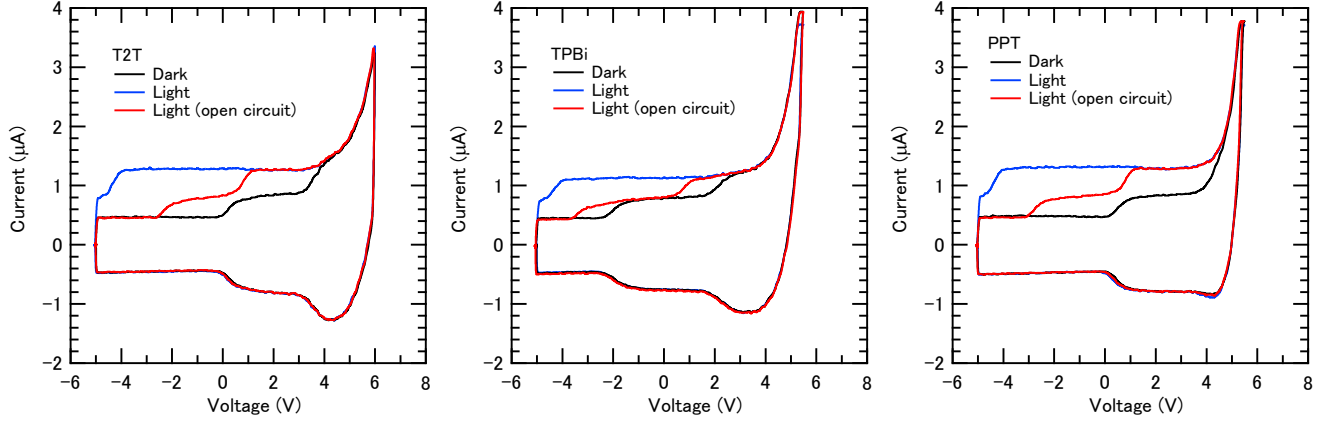

**Figure S5:** DCM characterization of T2T, TPBi and PPT devices after light irradiation. Accumulated electron in the devices ( $\sigma_{acc}$ : filled area) is estimated by subtracting integration of DCM curve after light irradiation from that in dark conditions.

**Figure S6.**

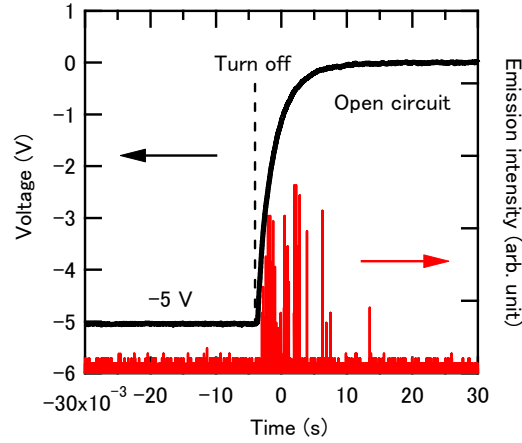

**Figure S6:** Electroluminescence in the T2T device after open circuit treatment.

**Figure S7.**

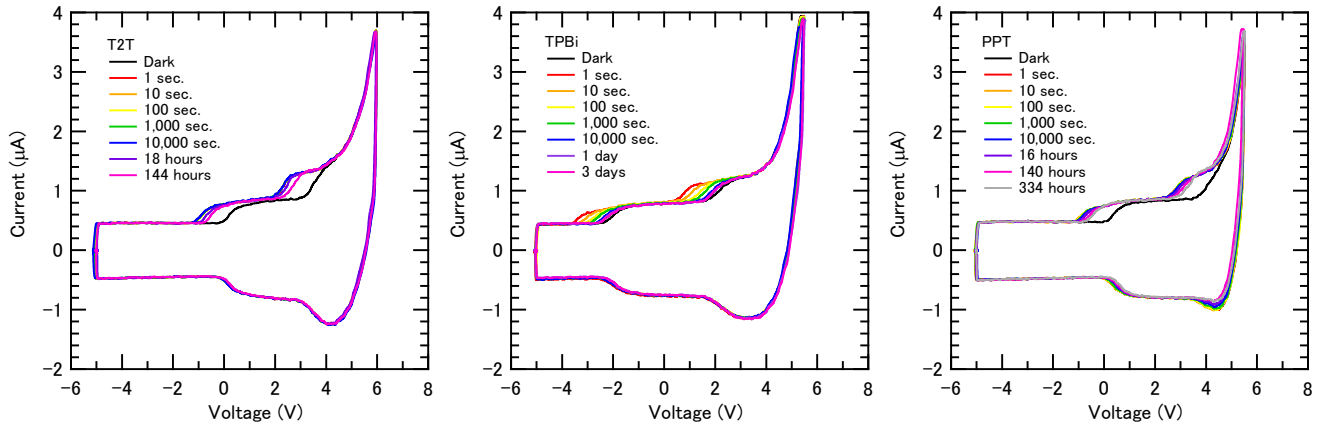

**Figure S7:** Charge storage characteristics in the condition of initial charge of  $\sim 3$  nC. DCM profiles of each device are acquired after an arbitral hold time passed.

**Figure S8.**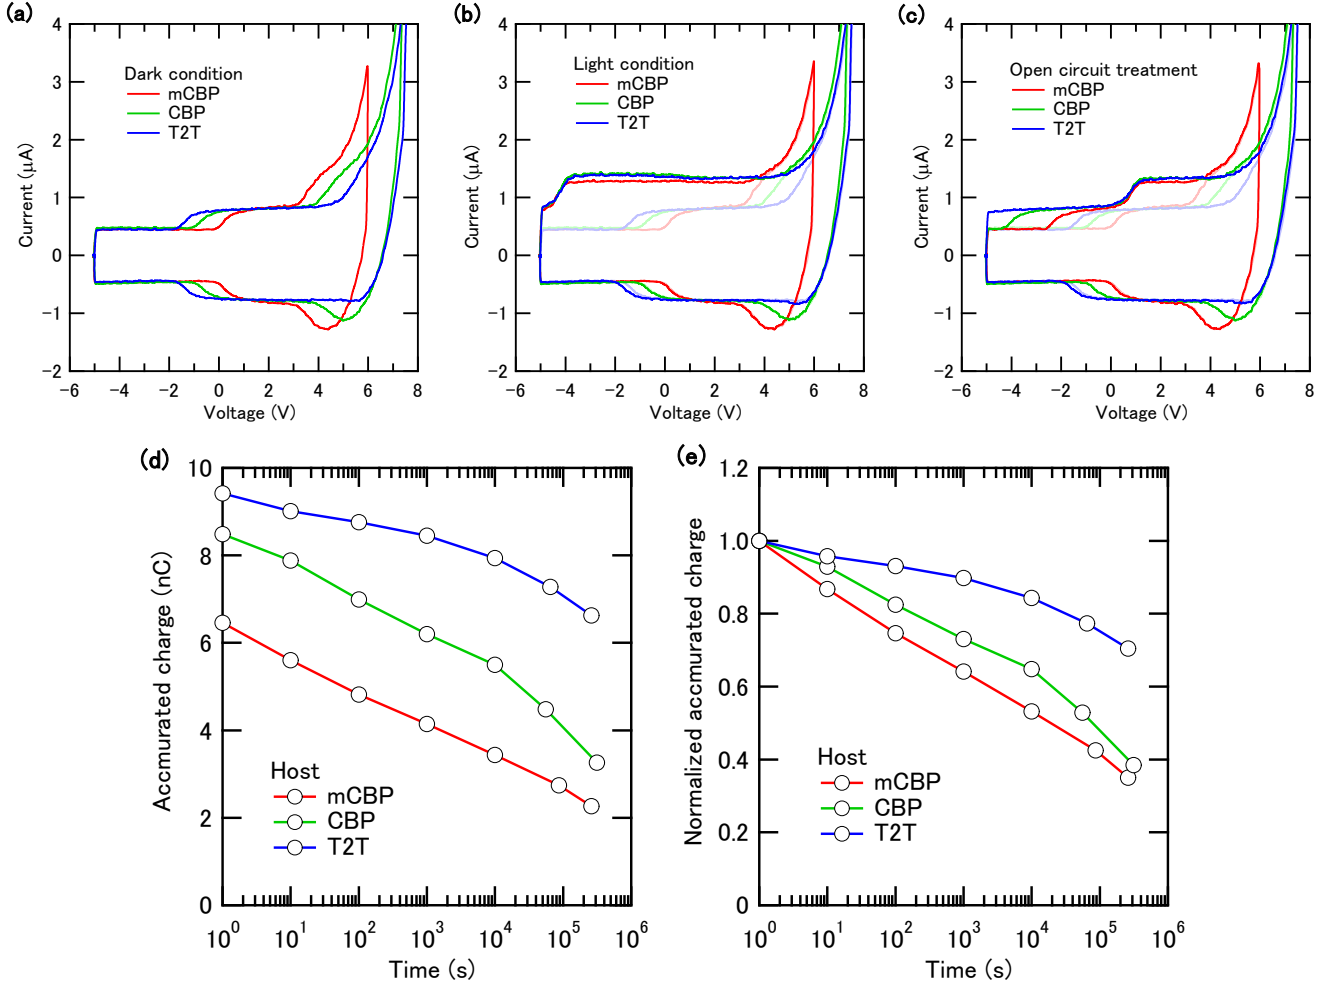

**Figure S8:** Characterization of SOP and charge storage ability in a device including different host materials. The device structure is ITO/HAT-CN (10 nm)/TAPC (50 nm)/Host:TPA-DCPP (30 nm)/T2T (50 nm)/Al. The host materials are mCBP, CBP and T2T, respectively. (a) DCM in dark condition. (b) DCM after light irradiation with applying  $-5\text{ V}$ . (c) DCM after open circuit treatment. (d) Decay of accumulated charge electrons calculated by the DCM profile. (e) Decay profiles which are normalized by the initial value.

**Table S1:** Electrical properties of a charge storage device including different host materials. All parameters are obtained by DCM shown in Fig.S8.

| Host material | GSP ( $P_{\text{PAL}}$ )<br>(mV/nm) | $\sigma_{\text{HTL/PAL}}$<br>(mC/m <sup>2</sup> ) | $V_{\text{inj}}$ (V) | $ \sigma_{\text{acc}} $ (nC) | $ \sigma_{\text{acc\_open}} $ (nC) |
|---------------|-------------------------------------|---------------------------------------------------|----------------------|------------------------------|------------------------------------|
| mCBP          | 32.5                                | -1.04                                             | -0.09                | 15.4                         | 6.4                                |
| CBP           | 46.3                                | -1.48                                             | -1.11                | 16.4                         | 9.1                                |
| T2T           | 60.6                                | -1.94                                             | -1.75                | 16.1                         | 10.4                               |
